# Supplementary material for: Recovery of Cerium Salts from Sewage Sludge Resulting from the Coagulation of Brewery Wastewater with Recycled Cerium Coagulant
Source: MDPI journal article supplement (doi:10.3390/ma17040938), 2024-02-17
Supplement: s1 [file s1]

# Recovery of Cerium Salts from Sewage Sludge Resulting from the Coagulation of Brewery Wastewater with Recycled Cerium Coagulant

Paweł Lejwoda <sup>1</sup>, Barbara Białecka <sup>2</sup>, Krzysztof Barbusiński <sup>3</sup> and Maciej Thomas <sup>4,\*</sup>

<sup>1</sup> Department of Energy Saving and Air Protection, Central Mining Institute in Katowice, Plac Gwarków 1, 40-166 Katowice, Poland; plejwoda@gig.eu

<sup>2</sup> Department of Environmental Monitoring, Central Mining Institute in Katowice, Plac Gwarków 1, 40-166 Katowice, Poland; bbialecka@gig.eu

<sup>3</sup> Department of Water and Wastewater Engineering, Silesian University of Technology, Konarskiego 18, 44-100 Gliwice, Poland; krzysztof.barbusinski@polsl.pl

<sup>4</sup> Faculty of Environmental Engineering and Energy, Cracow University of Technology, Warszawska 24, 31-155 Cracow, Poland

\* Correspondence: maciej.thomas@pk.edu.pl

**Table S1.** Analysis of the central composite design experiment using Statistica 13. Evaluation of the effects,  $Ce^{3+}$ ;  $R^2 = 0.938$ ;  $R^2_{adj} = 0.882$ ,  $MS = 59.277$ .

| Parameter            | Effect  | Standard error | t(10)  | p       | CI (-95%) | CI (+95%) | Factor  | Standard error | CI (-95%) | CI (+95%) |
|----------------------|---------|----------------|--------|---------|-----------|-----------|---------|----------------|-----------|-----------|
| Constant value       | 102.050 | 3.140          | 32.499 | < 0.001 | 95.053    | 109.046   | 102.050 | 3.140          | 95.053    | 109.046   |
| (1) liquid:solid (L) | 0.347   | 4.167          | 0.083  | 0.935   | -8.937    | 9.631     | 0.173   | 2.083          | -4.469    | 4.815     |
| liquid:solid (Q)     | -4.633  | 4.056          | -1.142 | 0.280   | -13.670   | 4.405     | -2.316  | 2.028          | -6.835    | 2.203     |
| (2) time (L)         | 0.270   | 4.167          | 0.065  | 0.950   | -9.014    | 9.554     | 0.135   | 2.083          | -4.507    | 4.777     |
| time (Q)             | -3.501  | 4.056          | -0.863 | 0.408   | -12.539   | 5.536     | -1.751  | 2.028          | -6.270    | 2.768     |
| (3) mg HCl (L)       | 40.904  | 4.167          | 9.817  | < 0.001 | 31.620    | 50.188    | 20.452  | 2.083          | 15.810    | 25.094    |
| mg HCl (Q)           | -29.631 | 4.056          | -7.305 | < 0.001 | -38.669   | -20.593   | -14.816 | 2.028          | -19.334   | -10.297   |
| 1L relative to 2L    | 1.887   | 5.444          | 0.347  | 0.736   | -10.243   | 14.017    | 0.944   | 2.722          | -5.122    | 7.009     |
| 1L relative to 3L    | -3.296  | 5.444          | -0.605 | 0.558   | -15.426   | 8.834     | -1.648  | 2.722          | -7.713    | 4.417     |
| 2L relative to 3L    | 0.178   | 5.444          | 0.033  | 0.975   | -11.952   | 12.308    | 0.089   | 2.722          | -5.976    | 6.154     |

\* mass ratio, statistically significant if  $p < 0.05$ .

**Table S2.** ANOVA analysis results for  $Ce^{3+}$  extraction.

| Parameter             | SS       | df | MS       | F      | p       |
|-----------------------|----------|----|----------|--------|---------|
| (1) liquid:solid (L)* | 0.410    | 1  | 0.410    | 0.007  | 0.935   |
| liquid:solid (Q)*     | 77.323   | 1  | 77.323   | 1.304  | 0.280   |
| (2) time (L)          | 0.248    | 1  | 0.248    | 0.004  | 0.950   |
| time (Q)              | 44.167   | 1  | 44.167   | 0.745  | 0.408   |
| (3) mg HCl (L)        | 5712.425 | 1  | 5712.425 | 96.369 | < 0.001 |
| mg HCl (Q)            | 3163.284 | 1  | 3163.284 | 53.365 | < 0.001 |
| 1L relative to 2L     | 7.123    | 1  | 7.123    | 0.120  | 0.736   |
| 1L relative to 3L     | 21.731   | 1  | 21.731   | 0.367  | 0.558   |
| 2L relative to 3L     | 0.063    | 1  | 0.063    | 0.001  | 0.975   |
| Error                 | 592.765  | 10 | 59.277   |        |         |
| Total sum of square   | 9509.054 | 19 |          |        |         |

\* mass ratio, statistically significant if  $p < 0.05$ .

**Table S3.** Analysis of the central composite design experiment using Statistica 13. Evaluation of the effects, total P;  $R^2 = 0.904$ ;  $R^2_{adj} = 0.817$ ,  $MS = 4.287$ .

| Parameter            | Effect | Standard error | t(10)  | P       | CI (-95%) | CI (+95%) | Factor | Standard error | CI (-95%) | CI (+95%) |
|----------------------|--------|----------------|--------|---------|-----------|-----------|--------|----------------|-----------|-----------|
| Constant value       | 20.217 | 0.844          | 23.942 | < 0.001 | 18.336    | 22.099    | 20.217 | 0.844          | 18.336    | 22.099    |
| (1) liquid:solid (L) | 0.389  | 1.120          | 0.347  | 0.736   | -2.108    | 2.885     | 0.194  | 0.560          | -1.054    | 1.443     |
| liquid:solid (Q)     | -0.065 | 1.091          | -0.059 | 0.954   | -2.495    | 2.366     | -0.032 | 0.545          | -1.247    | 1.183     |
| (2) time (L)         | 0.267  | 1.120          | 0.238  | 0.817   | -2.230    | 2.763     | 0.133  | 0.560          | -1.115    | 1.382     |
| time (Q)             | 0.088  | 1.091          | 0.081  | 0.937   | -2.343    | 2.518     | 0.044  | 0.545          | -1.171    | 1.259     |
| (3) mg HCl (L)       | 9.177  | 1.120          | 8.190  | < 0.001 | 6.680     | 11.674    | 4.589  | 0.560          | 3.340     | 5.837     |
| mg HCl (Q)           | -5.469 | 1.091          | -5.014 | < 0.001 | -7.899    | -3.039    | -2.734 | 0.545          | -3.950    | -1.519    |
| 1L relative to 2L    | 0.655  | 1.464          | 0.447  | 0.664   | -2.607    | 3.917     | 0.327  | 0.732          | -1.304    | 1.958     |
| 1L relative to 3L    | -1.105 | 1.464          | -0.755 | 0.468   | -4.367    | 2.157     | -0.553 | 0.732          | -2.184    | 1.078     |
| 2L relative to 3L    | -0.034 | 1.464          | -0.023 | 0.982   | -3.296    | 3.228     | -0.017 | 0.732          | -1.648    | 1.614     |

\* mass ratio, statistically significant if  $p < 0.05$ .

**Table S4.** ANOVA analysis results for total P extraction.

| Parameter             | SS      | df | MS      | F      | p       |
|-----------------------|---------|----|---------|--------|---------|
| (1) liquid:solid (L)* | 0.515   | 1  | 0.515   | 0.120  | 0.736   |
| liquid:solid (Q)*     | 0.015   | 1  | 0.015   | 0.003  | 0.954   |
| (2) time (L)          | 0.243   | 1  | 0.243   | 0.057  | 0.817   |
| time (Q)              | 0.028   | 1  | 0.028   | 0.006  | 0.937   |
| (3) mg HCl (L)        | 287.540 | 1  | 287.540 | 67.080 | < 0.001 |
| mg HCl (Q)            | 107.758 | 1  | 107.758 | 25.139 | < 0.001 |
| 1L relative to 2L     | 0.858   | 1  | 0.858   | 0.200  | 0.664   |
| 1L relative to 3L     | 2.443   | 1  | 2.443   | 0.570  | 0.468   |
| 2L relative to 3L     | 0.002   | 1  | 0.002   | 0.001  | 0.982   |
| Error                 | 42.865  | 10 | 4.287   |        |         |
| Total sum of square   | 444.324 | 19 |         |        |         |

\* mass ratio, statistically significant if  $p < 0.05$ .
